# Supplementary material for: Harmful or Physiologic: Diagnosing Fibrinolysis Shutdown in a Trauma Cohort With Rotational Thromboelastometry
Source: PubMed Central journal article supplement — Anesth Analg. 2018 Apr 19;127(4):840–9. doi: 10.1213/ANE.0000000000003341 (PMC6135473; doi:10.1213/ane.0000000000003341), 2018-04-19
Supplement: ane-127-0840-s002.pdf [file ane-127-0840-s002.pdf]

**Supplementary Table S1. Causes of Death by Fibrinolysis Groups.**

|                               | <b>Physiologic</b><br>ML, 3-15%;<br>n=25 (6.4%) | <b>Shutdown</b><br>ML <3%;<br>n=18 (12.7%) | <b>Hyperfibrinolysis</b><br>ML> 15%,<br>n=11 (55%) | <b>All Patients</b><br>N=55 |
|-------------------------------|-------------------------------------------------|--------------------------------------------|----------------------------------------------------|-----------------------------|
| <b>Anoxic Brain Injury</b>    | 1 (4)                                           | 2 (11.1)                                   | 1 (9)                                              | 4(7.4)                      |
| <b>Bleeding</b>               | 1 (4)                                           | 1 (5.5)                                    | 3 (27.2)                                           | 5 (9.3)                     |
| <b>Traumatic Brain Injury</b> | 14 (56)                                         | 12 (66.6)                                  | 5 (45.4)                                           | 31 (57.4)                   |
| <b>Multiorgan Failure</b>     | 3 (12)                                          | 2 (11.1)                                   | 1 (9)                                              | 6 (11.1)                    |
| <b>Pulmonary Embolism</b>     | 0                                               | 1 (5.5)                                    | 0                                                  | 1 (1.9)                     |
| <b>Withdraw Life Support</b>  | 3 (12)                                          | 0                                          | 0                                                  | 3 (5.6)                     |
| <b>Other</b>                  | 3 (12)                                          | 0                                          | 1 (9)                                              | 4(7.4)                      |

Other causes include: cardiac arrest without known preceding event. Withdraw of life support includes patients with significant injuries but otherwise stable.

**Supplementary Table S2. Multivariable Logistic Regression Model to Evaluate Association Between ISS and a Physiologic Fibrinolysis Phenotype**

| Variable, odds ratio units                            | Physiologic Fibrinolysis<br>OR(95% CI) | p-value |
|-------------------------------------------------------|----------------------------------------|---------|
| Age, per every 5y increase                            | 0.94 (0.88-1.002)                      | 0.059   |
| ISS, per every 5 points increase                      | 0.94 (0.83-1.06)                       | 0.3266  |
| AIS Head, per every 1 point increase                  | 0.98 (0.87-1.11)                       | 0.7912  |
| <b>Penetrating: Blunt</b>                             | 1.34 (0.67-2.66)                       | 0.4006  |
| <b>Male: Female</b>                                   | 0.70 (0.41-1.19)                       | 0.1930  |
| <b>Tranexamic acid Pre-Hospital</b>                   | 0.99 (0.54-1.83)                       | 0.9914  |
| Base Excess, per every 1 mEq/L increase               | 1.1 (1.04-1.16)                        | 0.0003  |
| Hemoglobin, per every 10 g/dL decrease                | 0.91 (0.79-1.05)                       | 0.2215  |
| Platelets, per every 20x 10 <sup>3</sup> /uL increase | 0.95 (0.89-1.02)                       | 0.2502  |
| INR, per every 0.1 increase                           | 0.97 (0.79-1.19)                       | 0.7846  |
| Fibrinogen, per every 0.5 g/dL decrease               | 0.85 (0.70-1.03)                       | 0.1052  |
| aPTT, per every 5 seconds increase                    | 0.76 (0.62-0.93)                       | 0.0098  |
| MCF, per every 2 mm increase                          | 0.84 (0.74- 0.94)                      | 0.0049  |
| CFT, per every 20 seconds increase                    | 0.68 (0.55- 0.85)                      | 0.0005  |

OR, odds ratio; CI, confidence interval; ISS, injury severity score; AIS, abbreviated injury severity score; INR, international normalized ratio; aPTT, activated prothrombin time; MCF, maximum clot formation; CFT, clot formation time. The independent variables were selected a priori (literature review and biological plausibility) and kept in the model irrespective of their p-value.

**Supplementary Table S3. Multivariable Logistic Regression Model to Evaluate Association Between ISS and a Hyperfibrinolysis Phenotype**

| Variable, odds ratio units                         | Hyperfibrinolysis<br>OR(95% CI) | p-value |
|----------------------------------------------------|---------------------------------|---------|
| ISS, per every 5 points increase                   | 1.27(1.09-1.47)                 | 0.0015  |
| Systolic Blood Pressure, per every 10mmHg decrease | 0.979(0.85-1.11)                | 0.7544  |
| Base Excess, per every 1 increase                  | 0.88(0.83-0.95)                 | 0.0005  |

OR, odds ratio; CI, confidence interval; ISS, injury severity score. The independent variables were selected a priori (literature review and biological plausibility) and kept in the model irrespective of their p-value.

**Supplementary Table S4. Multivariable Logistic Regression Model to Evaluate Association Between Fibrinolysis Shutdown and Massive Transfusion**

| <b>Variable, odds ratio units</b>             | <b>Massive Transfusion<br/>OR (95% CI)</b> | <b>p-value</b> |
|-----------------------------------------------|--------------------------------------------|----------------|
| <b>Shutdown</b>                               | 2.14 (0.79-5.74)                           | 0.1308         |
| <b>ISS, per every 5 points increase</b>       | 1.23 (1.04-1.45)                           | 0.0149         |
| <b>SBP, per every 10mmHg decrease</b>         | 1.68 (1.38-2.04)                           | <.0001         |
| <b>Hemoglobin, per every 10 g/dL decrease</b> | 1.29 (1.02-1.64)                           | 0.0332         |

OR, odds ratio; CI, confidence interval; ISS, injury severity score; SBP, systolic blood pressure. The independent variables were selected a priori (literature review and biological plausibility) and kept in the model irrespective of their p-value.

**Supplementary Table S5. Multivariable Logistic Regression Model to Evaluate Association Between Fibrinolysis Shutdown and Thrombotic Events**

| <b>Variable, odds ratio units</b>       | <b>Thrombotic Events<br/>OR (95% CI)</b> | <b>p-value</b> |
|-----------------------------------------|------------------------------------------|----------------|
| <b>Shutdown</b>                         | 1.08 (0.37- 3.15)                        | 0.8744         |
| <b>Age, per every 5y increase</b>       | 1.16 (1.028-1.31)                        | 0.0159         |
| <b>ISS, per every 5 points increase</b> | 1.07 (0.87-1.3)                          | 0.4875         |
| <b>Transfusion within 24h</b>           | 3.17 (1.11-9.06)                         | 0.0311         |

OR, odds ratio; CI, confidence interval; ISS, injury severity score. The independent variables were selected a priori (literature review and biological plausibility) and kept in the model irrespective of their p-value.
